# Supplementary material
Source: ML conference proceedings conference paper supplement (https://openaccess.thecvf.com/content/CVPR2024/html/Poudel_ReCoRe_Regularized_Contrastive_CVPR_2024_paper.html)
Supplement: Supplementary file [file Poudel_ReCoRe_Regularized_Contrastive_CVPR_2024_supplemental.pdf]

# ReCoRe: Regularized Contrastive Representation Learning of World Model

## Supplementary Material

Rudra P.K. Poudel<sup>1</sup>   Harit Pandya<sup>1</sup>   Stephan Liwicki<sup>1</sup>

<sup>1</sup> Cambridge Research Laboratory  
Toshiba Europe Ltd, UK

first-name.last-name@toshiba.eu

Roberto Cipolla<sup>1,2</sup>

<sup>2</sup> Department of Engineering  
University of Cambridge, UK

rc10001@cam.ac.uk

### 1. Qualitative Results of ReCoRe

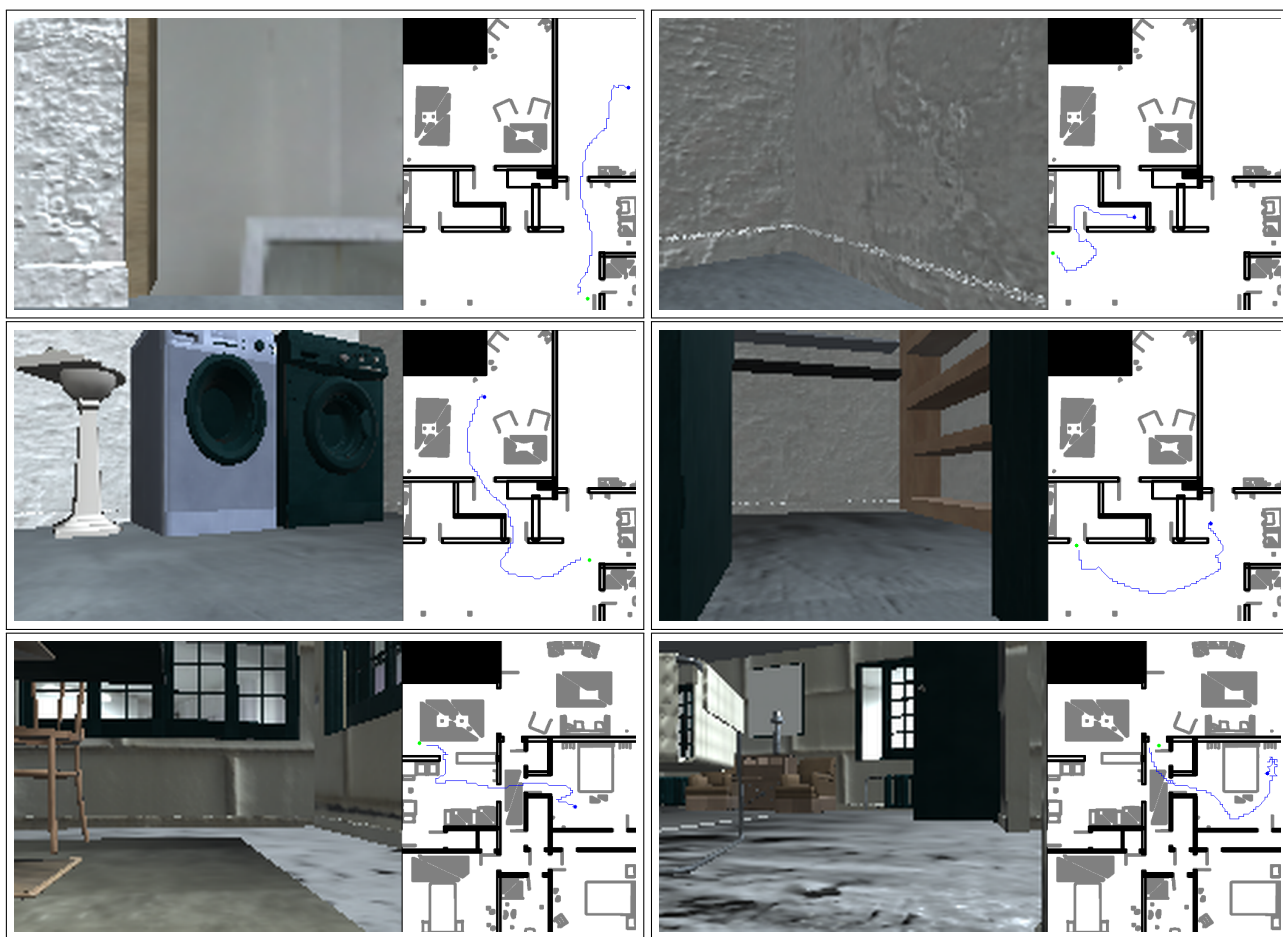

Figure 1. The out-of-distribution generalization tests of proposed ReCoRe on held-out scenes and visual textures from iGibson 1.0. Green circle is a random *PointGoal*, blue circle is a random starting point and blue line represents the travel path of the Turtlebot robot.

## 2. Hyper Parameters

| Name                                   | Symbol     | Value                       |
|----------------------------------------|------------|-----------------------------|
| World Model                            |            |                             |
| Dataset size (FIFO)                    | —          | $3 \cdot 10^5$              |
| iGibson input image size               | $o$        | $120 \times 160$            |
| Batch size                             | $B$        | 50                          |
| Sequence length                        | $L$        | 50                          |
| Discrete latent dimensions             | —          | 32                          |
| Discrete latent classes                | —          | 32                          |
| RSSM number of units                   | —          | 1024                        |
| KL loss scale                          | $\beta$    | 1.0                         |
| World model learning rate              | —          | $3 \cdot 10^{-4}$           |
| Key encoder exponential moving average | —          | 0.999                       |
| Behavior                               |            |                             |
| Imagination horizon                    | $H$        | 15                          |
| Actor learning rate                    | —          | $1 \cdot 10^{-4}$           |
| Critic learning rate                   | —          | $1 \cdot 10^{-4}$           |
| Slow critic update interval            | —          | 100                         |
| Common                                 |            |                             |
| Policy steps per gradient step         | —          | 4                           |
| Policy and reward MPL number of layers | —          | 4                           |
| Policy and reward MPL number of units  | —          | 400                         |
| Gradient clipping                      | —          | 100                         |
| Adam epsilon                           | $\epsilon$ | $10^{-5}$                   |
| Encoder and Decoder                    |            |                             |
| MLP encoder sizes of task obs          | —          | 32, 32                      |
| Encoder kernels sizes                  | —          | 4, 4, 4, 4, 4               |
| Decoder kernels sizes                  | —          | 5, 5, 4, 5, 4               |
| Encoder and decoder feature maps       | —          | 32, 64, 128, 256, 512       |
| Encoder and decoder strides            | —          | 2, 2, 2, 2, 2               |
| Decoder padding                        | —          | none, 0-1, none, none, none |
| Data Augmentation                      |            |                             |
| Padding range                          | —          | 10                          |
| Hue delta                              | —          | 0.1                         |
| Brightness delta                       | —          | 0.4                         |
| Contrast delta                         | —          | 0.4                         |
| Saturation delta                       | —          | 0.2                         |
| Gaussina blur sigma min, max           | —          | 0.1, 2.0                    |
| Cutout min, max                        | —          | 30, 50                      |

Table 1. Hyper parameters of proposed ReCoRe.

### 3. iGibson 1.0 Training and Evaluation Splits

| Phase    | Scene names                                                                                                                                                                                                   |
|----------|---------------------------------------------------------------------------------------------------------------------------------------------------------------------------------------------------------------|
| Training | Beechwood_0_int, Beechwood_1_int,<br>Benevolence_0_int, Benevolence_1_int, Benevolence_2_int<br>Merom_0_int, Merom_1_int,<br>Pomaria_0_int, Pomaria_1_int, Pomaria_2_int,<br>Wainscott_0_int, Wainscott_1_int |
| Testing  | Ihlen_0_int, Ihlen_1_int, Rs_int                                                                                                                                                                              |

Table 2. Train-test scenes splits for iGibson 1.0 dataset.

| Material category   | Held-out texture ids for test |
|---------------------|-------------------------------|
| asphalt             | 06, 15                        |
| bricks              | 08, 19                        |
| concrete            | 06, 15, 17                    |
| fabric              | 01, 02, 28                    |
| fabric_carpet       | 02, 05, 13                    |
| ground              | 13, 19                        |
| leather             | 03, 12                        |
| marble              | 02, 03                        |
| metal               | 10, 19                        |
| metal_diamond_plate | 04                            |
| moss                | 01, 03                        |
| paint               | 05                            |
| paving_stones       | 24, 38                        |
| planks              | 07, 09, 16                    |
| plaster             | 03                            |
| plastic             | 04, 05                        |
| porcelain           | 02, 04                        |
| rocks               | 04                            |
| terrazzo            | 06, 08                        |
| tiles               | 43, 49                        |
| wood                | 02, 05, 16, 22, 32            |
| wood_floor          | 06, 10, 17, 28                |

Table 3. iGibson 1.0 environment held out texture ids for test.

|          |       |                                                                                     |                                                                                     |                                                                                       |
|----------|-------|-------------------------------------------------------------------------------------|-------------------------------------------------------------------------------------|---------------------------------------------------------------------------------------|
| concrete | Train |    |    |    |
|          | Test  |    |    |    |
| fabric   | Train |    |    |    |
|          | Test  |    |    |    |
| planks   | Train |   |   |   |
|          | Test  |  |  |  |
| wood     | Train |  |  |  |
|          | Test  |  |  |  |

Table 4. Examples of textures from the training and testing splits of iGibson 1.0 benchmark. Note the significant variation between textures used in training and those employed in testing, which facilitates the evaluation of out-of-distribution generalization.
